1                   **The HIV-1 Integrase C-Terminal domain induces TAR RNA structural**  
2                   **changes promoting Tat binding.**

3

4 Cecilia Rocchi<sup>1§</sup>, Camille Louvat<sup>1§</sup>, Adriana Miele<sup>2</sup>, Julien Batisse<sup>3</sup>, Christophe Guillon<sup>1</sup>, Lionel  
5 Ballut<sup>1</sup>, Daniela Lener<sup>4</sup>, Matteo Negroni<sup>4</sup>, Marc Ruff<sup>3</sup>, Patrice Gouet<sup>1</sup> and Francesca Fiorini<sup>1\*</sup>.

6 <sup>1</sup> Molecular Microbiology and Structural Biochemistry, MMSB-IBCP, UMR 5086 CNRS University  
7 of Lyon, 7 passage du Vercors, 69367, Lyon Cedex 07, France.

8 <sup>2</sup> Institute of Analytical Sciences, UMR 5280 CNRS UCBL University of Lyon, 5 Rue de la Doua,  
9 69100 Villeurbanne, France.

10 <sup>3</sup> Chromatin Stability and DNA Mobility, Department of Integrated Structural Biology, IGBMC,  
11 CNRS UMR 7104 – Inserm U 158 University of Strasbourg, 1 rue Laurent Fries, 67404, Illkirch  
12 Cedex, France.

13 <sup>4</sup> RNA architecture and reactivity, IBMC, CNRS UPR 9002 University of Strasbourg, 2, Allée  
14 Konrad Roentgen, 67084 Strasbourg Cedex, France.

15

16 § : equal contribution

17 \*To whom correspondence should be addressed: [francesca.fiorini@ibcp.fr](mailto:francesca.fiorini@ibcp.fr)

18

19 **ABSTRACT**

20 Recent evidence indicated that HIV-1 Integrase (IN) binds genomic viral RNA (gRNA) playing a  
21 critical role in viral particle morphogenesis and gRNA stability in host cells. Combining biophysical  
22 and biochemical approaches we show that the C-terminal flexible 18-residues tail of IN acts as a  
23 sensor of the peculiar apical structure of trans-activation response element RNA (TAR), directly  
24 interacting with its hexaloop. We highlighted how the whole IN C-terminal domain, once bound to  
25 TAR, can change its structure assisting the binding of Tat, the HIV trans-activator protein, which  
26 finally displaces IN from TAR. Our results are consistent with the emerging role of IN in early stage  
27 of proviral transcription and suggest new steps of HIV-1 life cycle that can be considered as  
28 therapeutic targets.

29

## 30 INTRODUCTION

31 Protein-nucleic acid interactions can occur through different types of protein binding  
32 domains and are responsible for a variety of essential molecular and cellular mechanisms and  
33 their regulation. This binding diversity has been well described by recent RNA interactome  
34 screenings revealing that the term RNA-Binding Domain (RBD) is no longer synonymous with a  
35 well-structured domain, but also with intrinsically disordered region (IDR) with non-canonical RNA-  
36 binding properties <sup>1 2 3</sup>. Moreover, an increasing level of complexity has been documented for  
37 certain transcription factors that are able to bind both DNA and RNA through separated structured  
38 or unstructured regions, resulting in a complex pattern of specific and non-specific interactions <sup>4</sup>  
39 <sup>5</sup>. This protein moonlighting is particularly true for RNA viruses which possess a relatively short  
40 genome encoding only for a small amount of proteins that must ensure many multiple functions  
41 during viral replication <sup>6 7</sup>.

42 A good example of moonlighting is represented by Human Immunodeficiency Virus type 1 (HIV-  
43 1) integrase (IN) which can bind both DNA and RNA <sup>8,9</sup>. As for all retroviruses, IN catalyzes the  
44 integration of viral cDNA (vDNA), produced by retro-transcription of genomic RNA (gRNA), into  
45 the host genome. Multimeric IN binds the vDNA ends forming the intasome complex able to  
46 catalyze the processing of 3'-end dinucleotides. After activation, the 3' extremities are then used  
47 by the intasome to attack the host DNA in order to integrate the provirus (reviewed in <sup>9</sup>). A step  
48 essential for HIV-1 productive infection <sup>10</sup>. Retroviral integrases are modular proteins that contain  
49 three structured domains: the N-terminal domain (NTD), the catalytic core domain (CCD) and the  
50 C-terminal domain (CTD), connected by unstructured regions. All three domains show protein-  
51 protein and protein-DNA interaction properties and are essential for enzymatic activity (reviewed  
52 in <sup>9</sup> and <sup>11</sup>). The CCD harbors the essential catalytic triad D, D, E that coordinates two Mg<sup>2+</sup>  
53 cofactors and folds similarly to nucleotidyl-transferases and nucleases <sup>12</sup>. The NTD is involved in  
54 enzyme multimerization and catalytic activity and shows a HHCC motif coordinating a Zn<sup>2+</sup> ion <sup>13</sup>  
55 <sup>14 15</sup>. The CTD is also involved in DNA interaction, multimerization, and possesses a SH3-like fold  
56 followed by a flexible 18-residues tail (CT) <sup>16 17 18 19</sup>. The SH3-like domain of IN is the minimal DNA  
57 binding site. In HIV-1 life cycle, this hub domain mediates the interaction with RT, with cellular  
58 nuclear import complex TRN-SR2; and with histone 4 tail, likely anchoring the intasome to the  
59 chromatin and therefore promoting an efficient integration <sup>20 21 22 23</sup>. The mutational study of flexible  
60 CT revealed a moderate implication in IN enzymatic activity <sup>21 24</sup>, but significant effect on the  
61 incorporation of IN in virions and on HIV-1 infectivity <sup>21</sup>. However the exact function of CT region  
62 remains largely unknown.

63 As mentioned before, recent works revealed that in HIV-1, IN is also an RBP with an  
64 essential role in virion morphogenesis, related to its ability to bind gRNA<sup>8 25 26</sup>. In fact, IN interacts  
65 with specific sites within gRNA ensuring the correct localization of viral RNP inside the capsid  
66 (reviewed in<sup>27</sup>). Aberrant virions are obtained when IN-gRNA interaction is abolished, highlighting  
67 the importance of the proper formation of IN-containing RNPs for HIV-1 infection<sup>(8,25,28)</sup>. In  
68 addition, the IN-gRNA interaction is also dictating the fate of the gRNA within the host cell in the  
69 early steps of infection. Indeed, when virions are defective for IN-gRNA interactions, viral infection  
70 is blocked at early stages of reverse transcription, due to a rapid degradation of gRNA in host cells  
71<sup>25,28</sup>. If the RBD within IN has not yet been structurally identified, most of the Lysine residues  
72 interacting with RNA are located within the CTD and overlap with those subjected to post-  
73 translational modification<sup>8 29 30 31</sup>. Importantly, Lysine 273, belonging to the flexible CT, seems to  
74 be the only Lysine dedicated to RNA interaction to be essential for viral infectivity<sup>8</sup>.

75 Recently, a new role has been proposed for HIV-1 IN during proviral transcription at early  
76 times after integration. In fact, after strand transfer, the IN remains bound to DNA and directly  
77 plays a role in proviral transcription, depending on its post-translational modifications of specific  
78 residues within the CTD<sup>32</sup>.

79 HIV-1 provirus is transcribed by the cellular RNA polymerase II (Pol II) which pauses  
80 shortly after initiation of transcription, due to the presence of negative elongation factors as well  
81 as nucleosomes downstream the transcription start site<sup>33 34</sup>. HIV-1 removes this block by encoding  
82 a transcriptional trans-activator Tat protein, which binds the nascent transcript on a structured  
83 RNA sequence named TAR (trans-activation response element RNA) using a non-canonical RBD.  
84 This allows the recruitment of the human super elongation complex (SEC)<sup>35 36 37 38</sup>. In particular,  
85 Tat binds to p-TEFb, a complex composed of CDK9 kinase and its regulatory partner the cyclin  
86 T1 (CycT1), and consequently drives SEC to TAR RNA. This complex triggers a cascade of  
87 phosphorylation of several transcription factors, which activate Pol II and recruit positive chromatin  
88 remodelers. Moreover, processivity of Pol II is also enhanced by pTEFb-mediated phosphorylation  
89 of its C-terminal domain<sup>39</sup> (reviewed in<sup>40</sup>). Unfortunately, molecular details about the interplay  
90 between IN and this cellular transcription initiation machinery are largely unknown so far.

91 Crosslinking-immuno-precipitation sequencing (CLIP-seq) experiments have identified the  
92 TAR RNA sequence as a major binding site of HIV-1 IN on the gRNA<sup>8</sup>. This observation, together  
93 with the recent finding of HIV-1 IN involvement in proviral transcription<sup>32</sup>, prompted us to study  
94 the interaction of IN with TAR RNA and its interplay with the Tat protein. Our results revealed that  
95 despite the apparent lack of structural specificity of IN *in vitro*, the CT flexible tail discriminates for

96 the proper TAR apical stem-loop. We described the consequences of the IN binding on the  
97 structure of TAR and on the subsequent Tat/TAR interaction, proposing a working model which  
98 foresees a possible involvement of IN in proviral transcription elongation before the arrival of Tat.

99

## 100 RESULTS

101

### 102 IN binds TAR RNA with no apparent structural specificity.

103 We first addressed whether full-length HIV-1 IN was able to specifically bind TAR RNA.  
104 One hindering aspect of this study is the well-known low solubility of HIV-1 IN as well as its  
105 flexibility between N-terminal (NTD), C-terminal (CTD) and catalytic core (CCD) domains that for  
106 long time frustrated structural studies (**Fig. 1a**<sup>41</sup>). The poor solubility *in vitro* is usually overcome  
107 by mutations of hydrophobic residues, however resulting in a replication-defective virus with  
108 mislocalized viral RNP phenotype analogous to that observed in IN mutants defective for the IN-  
109 gRNA interaction<sup>19 8,25,28</sup>. We have chosen to express recombinant wild-type N-Terminal Flag-  
110 tagged IN-FL in eukaryotic expression system as previously described (<sup>42</sup> **Supplementary Fig.**  
111 **1a**, left panel) and called it IN-FLm (1-288 amino acids [aa]). Mass spectrometry analysis of this  
112 protein revealed post-translational modification at several residues: Serine 24 was phosphorylated  
113 and Lysine 46, 173, 211 and 273 residues were acetylated. The protein produced in mammalian  
114 cells was shown to have an increased solubility as compared to that produced in *E. coli* and also  
115 an enhanced enzymatic activity *in vitro*<sup>42</sup>. However, after purification, we kept the protein in  
116 solution after buffer optimization. In this study we used an electrophoretic mobility shift assay  
117 (EMSA) in order to assess qualitatively the binding of IN to a synthetic TAR RNA, whose  
118 secondary structure is depicted in **Fig. 1b**, to a weakly structured RNA<sub>(30)</sub>-mer (**Supplementary**  
119 **Fig. 1b**, left panel) and to an unstructured AG<sub>(50)</sub>-mer RNA (**Fig. 1c**). We have incubated  
120 radiolabeled RNA with increasing concentrations of purified IN-FLm. A band shift was observed  
121 with TAR RNA upon gel electrophoresis under nearly physiological salt concentration, reflecting  
122 the formation of an IN:TAR complex (**Fig. 1c**). IN-FLm also bound weakly-structured RNA<sub>(30)</sub>-mer  
123 (**Supplementary Fig. 1b**, right panel), while it had a markedly reduced affinity for unstructured  
124 AG<sub>(50)</sub>-mer RNA (**Fig. 1c**). IN-FL produced in prokaryotic expression system (**Supplementary Fig.**  
125 **1a**, right panel) is also able to bind TAR (**Supplementary Fig. 1c**).

126 As RNA-interacting lysine residues are contained within the C-terminal domain of IN<sup>8</sup>, we  
127 focused on this domain. We expressed and purified the whole C-Terminal Domain (IN-CTD; aa

128 222-288). We first determined whether IN-CTD was able to interact with structurally distinct viral  
129 genomic RNA elements of similar nucleotide length derived from HIV-1 5' UTR. In addition to TAR,  
130 we synthesized three other RNA hairpins: the polyadenylation (polyA) signal, the dimerization  
131 initiation sequence (DIS) and the major splice-donor (SD) together with  $\Psi$  packaging element (Psi)  
132 (**Fig. 1d**, top panel). IN-CTD bound all those RNAs with no measurable difference (**Fig. 1d**, bottom  
133 panel), suggesting that IN can bind structured RNA through its C-terminal domain.

134 Subsequently, we wanted to address whether the C-terminal flexible tail (CT) spanning the  
135 last 18 residues of CTD affected the RNA binding properties of IN. We expressed the CTD without  
136 its terminal tail (IN-CTD- $\Delta$ CT; aa 220-270, **Fig. 1a**) and used a chemically synthesized IN-CT  
137 peptide (aa 270-288; **Fig. 1a**). The boundaries between CTD and CT were defined according to  
138 sequence alignment and previous structural studies<sup>16 43,44 45</sup>. The IN-CT is not conserved among  
139 lentiviruses (**Supplementary Fig. 2a**), however, multiple alignment of IN-CT from human HIV-1  
140 subtypes and simian viruses (**Fig. 1e**) showed a 58 % of sequence identity and 87 % of similarity  
141 (equivalent residues considering physical-chemical properties).

142 EMSA assays did not shown apparent differences between the affinities of IN-CTD and  
143 IN-CTD- $\Delta$ CT for TAR under physiological salt conditions (**Supplementary Fig. 2b**). To measure  
144 the rate constants of the IN-CTD and IN-CTD- $\Delta$ CT interactions with TAR, we used Bio-layer  
145 interferometry (BLI). A 3' biotinylated TAR RNA, was immobilized on a streptavidin-coated  
146 biosensor to serve as a bait molecule (**Fig. 1f**, top panel). Subsequently, the interactions of IN  
147 subdomains with the TAR RNA were monitored in real time and the resulting sensorgrams are  
148 shown in **Supplementary Fig. 2c**. Fitted data resulted in  $K_D$  values of 0.77 and 0.32  $\mu$ M for IN-  
149 CTD- $\Delta$ CT and IN-CTD, respectively (**Fig. 1f**, bottom panel). Thus, the presence of the 18 aa C-  
150 terminal tail only slightly affects the RNA binding affinity of IN-CTD.

151

## 152 **The C-terminal Tail senses the TAR RNA shape.**

153 It has been shown that the presence of the bulge and the loop in TAR RNA, rather than its  
154 sequence, is critical for IN binding, as the deletion of one or both markedly decreased IN binding  
155 affinity<sup>8</sup>. We wondered whether the shape of the peculiar apical stem-loop of TAR (**Fig. 2a**) could  
156 also be important for IN binding. Therefore, we mutated the 4- nucleotides (nt) stem between the  
157 bulge and the loop to change its length, as shortening or lengthening the 4 nt-stem is likely to  
158 tighten or loosen the TAR major groove by bringing the bulge and the hexa-loop closer or further,  
159 respectively. We produced TAR with 1 bp longer stem (TAR-LS) and two with progressively

160 shorter stem TARs (TAR-SS and TAR-VSS) (**Fig. 2a**). The EMSA assay showed that IN-FLm was  
161 able to bind TAR-LS similarly to the wild-type TAR (**Supplementary Fig. 3a**, lines A and B). On  
162 the contrary, shortening of the stem reduced IN-FLm affinity for TAR (**Supplementary Fig. 3a**,  
163 lines C to E). Furthermore, we assessed the binding behavior of IN-CTD and INCTD- $\Delta$ CT to TAR  
164 mutants by EMSA (**Fig. 2b** and **2c**). As observed for the full-length protein, the affinity of IN-CTD  
165 for TAR mutants decreased as the length of the stem was reduced (**Fig. 2b**, lines A to D and **Fig.**  
166 **2c**). Surprisingly, the binding ability of IN-CTD- $\Delta$ CT was not affected by the shortening of the TAR  
167 4nt-stem (**Fig. 2b**, lines A' to D', and **Fig. 2c**), suggesting that IN C-terminal tail senses the shape  
168 of the TAR RNA stem *in vitro*.

169 As a control, we studied the interaction of Tat with TAR, the cognate interacting protein.  
170 We used a chemically synthesized full-length Tat protein (1-102 aa) to assess the binding with  
171 TAR mutants by EMSA assay. Similarly to IN-CTD and consistently with other *in vitro* and *ex vivo*  
172 information<sup>46 47 48 49</sup>, the binding ability of Tat decreased with stem shortening (**Supplementary**  
173 **Fig. 3b**).

174 Overall, our results suggest that IN-CT interacts with the apical stem-loop of TAR, possibly  
175 with its major groove. This is consistent with the CLIP-seq data, which had identified the TAR  
176 hexaloop as a major binding site for IN and with a recently published structural model of IN-CTD-  
177  $\Delta$ CT bound with TAR<sup>8 50</sup>.

178

### 179 **IN-CTD deeply affect the structure of TAR favoring Tat interaction.**

180 In order to extend the binding analysis at the molecular level, the IN-TAR interaction was  
181 probed by footprinting techniques. 5' radiolabeled TAR, alone or complexed to protein, was  
182 subjected to partial digestion using RNase T1 that cleaves 3' to an unpaired guanine. The results  
183 shown in **Fig. 3a** indicated that G34 and G36 of TAR were protected in the presence of IN-CTD  
184 (**Fig. 3a**, lane 6), instead the binding of IN-CT and IN-CTD- $\Delta$ CT did not protect these nucleotides  
185 from nuclease digestion (**Fig. 3a**, lanes 4 and 5). This suggested that the CT region is interacting  
186 with G34 and G36 nucleotides located in the TAR hexaloop and its junction with the 4-nt stem  
187 when CT is part of the whole domain (**Fig. 3a**, lane 6). Surprisingly, we observed prominent  
188 cleavage following the residues at positions C41, U38, G32 and, to a lesser extent, G28, induced  
189 by the binding of IN-CTD- $\Delta$ CT and IN-CTD even in the absence of T1 nuclease (**Supplementary**  
190 **Fig. 4a**, left panel). This reflected the presence of drastic structural constraints on the apical stem-  
191 loop of TAR upon the binding of either IN-CTD- $\Delta$ CT or IN-CTD, which leads to a spontaneous

192 mechanical breakage. Any nuclease contamination has been observed in protein solution  
193 (**Supplementary Fig. 4a**, right panel). Altogether, these digestion patterns showing the protection  
194 of G34 and G36 by IN-CTD, but not IN-CTD- $\Delta$ CT, as well as the evidence of the structural  
195 deformation of TAR induced by the binding of both fragments, indicate that: (i) IN-CTD binds to  
196 the TAR apical stem-loop; (ii) IN-CTD modifies the structure of the RNA; (iii) the CT exerts a  
197 specific role in the interaction of IN-CTD with the TAR hexaloop and its junction with the stem. The  
198 fact that CT binds TAR only in the IN-CTD context, could reflect the necessity for a distortion of  
199 TAR by the IN-CTD- $\Delta$ CT moiety to allow for the correct binding of CT to the hexaloop. Therefore  
200 the role of Tat seems to be that of coating TAR which resulted in a prevention of nuclease digestion  
201 (**Fig. 3a**, lane 7).

202 In order to understand whether the structural changes of TAR induced by IN were affecting  
203 the binding affinity of Tat, we performed displacement experiments by BLI. 3' biotinylated TAR  
204 was previously immobilized to streptavidin-coated biosensor, then IN association to TAR was  
205 monitored as described before. Afterwards, the sensor was absorbed in solutions containing  
206 various concentrations of Tat (**Fig. 3b**). We calculated the apparent  $K_D$  by measuring the  $\Delta$   
207 Wavelength Shift between the minimum wavelength after Tat injection (around 400 s) and the  
208 maximum wavelength reach at 600 s (**Supplementary Fig. 4c**), and we plotted the values against  
209 the corresponding Tat concentrations (**Fig. 3c**). The  $K_D$  of Tat binding to TAR was about 37.5 and  
210 75 times lower in presence of IN-CTD- $\Delta$ CT and IN-CTD respectively (**Fig. 3c**) compared to the  $K_D$   
211 of Tat measured in the same conditions for the naked RNA (**Fig. 3d** and **Supplementary Fig. 4d**).  
212 Moreover, the binding kinetics of Tat on IN/TAR complex is consistent with a cooperative  
213 interaction (**Fig. 3c**). Notably, the IN-CTD:TAR complex can accommodate more Tat than IN-CTD-  
214  $\Delta$ CT:TAR, as indicated by the higher  $B_{Max}$  (**Fig. 3c**). To exclude that these results derived from a  
215 direct interaction between IN-CTD and Tat, we performed a pulldown assay which did not show  
216 protein-protein interaction in these conditions (**Supplementary Fig. 4e**).

217

### 218 **Tat competes with IN-CTD and displaces it from TAR.**

219 To investigate the mechanism involved in Tat binding to IN:TAR complexes, we performed  
220 a dose-dependent competition EMSA (**Fig. 4a**), in the presence of 10  $K_D$  IN/TAR ratio. We could  
221 confirm that Tat binds to TAR in a dose-response manner (**Fig. 4a**, lanes 13-17). Interestingly, we  
222 observed a dose-dependent interference between Tat and IN-CTD for TAR binding at intermediate  
223 (**Fig. 4a**, lanes 4 and 5), but not at high concentrations of Tat (**Fig. 4a**, lane 6). Furthermore, no

224 interference was observed at any concentration for IN-CTD- $\Delta$ CT (**Fig. 4a**, lanes 9 to 12),  
225 confirming that the mechanism was dependent on the presence of the CT tail. Since the migration  
226 pattern of the EMSA cannot discriminate between IN-bound and Tat-bound RNAs, we assessed  
227 whether the presence of Tat would modify the binding of IN to 3' biotinylated TAR by pull-down  
228 assays (**Fig. 4b**). IN-CTD and IN-CTD- $\Delta$ CT were efficiently co-precipitated (**Fig. 4b**, lanes 1 and  
229 5, respectively), whereas the addition of increasing concentrations of Tat serially decreased their  
230 binding to TAR (**Fig. 4b**, lanes 2 to 4 and 6 to 8, respectively). Control experiments showed that  
231 Tat also interacted with TAR and was not precipitated when biotinylated TAR was absent (**Fig.**  
232 **4b**, lanes 9 and 10). Altogether these results underline a competition of Tat and IN for TAR binding.  
233 The fact that very small differences were detected between IN-CTD and IN-CTD- $\Delta$ CT during TAR-  
234 pulldown assay (**Fig. 4b**), while they were observed in EMSA (**Fig. 4a**) is likely due to the higher  
235 sensitivity offered by the latter, in which nanomolar concentrations of proteins and RNA were used.

236

## 237 **DISCUSSION**

238 The C-terminal tail of HIV-1 IN ensures several functions essential for infectivity. A  
239 comprehensive understanding of its involvement in the various steps of the infectious cycle is still  
240 lacking due to a lack of structural information and to the pleiotropic effects caused by its mutations  
241 <sup>51 21</sup>. Here, we found that this intrinsically disordered region of IN acts as a specific sensor for the  
242 peculiar structure of the apical stem-loop of TAR RNA and is directly interacting with its apical  
243 hexaloop. We probed IN/TAR interaction by EMSA, nuclease digestion and bio layer  
244 interferometry. Data analysis suggested that IN-CTD modified TAR conformation, leading to an  
245 enhanced binding of Tat, especially when CT region is present. Moreover, we put forth evidence  
246 for an interplay between Tat, IN and TAR, where Tat is competing with IN-CTD for TAR binding  
247 and destabilizes preformed IN-CTD:TAR complex.

248 Mutations of TAR aimed at altering the peculiar structure of the apical portion decreased  
249 the relative affinity of IN-CTD compared to IN-CTD- $\Delta$ CT, suggesting a role of CT in the recognition  
250 of this portion of TAR structure (**Fig. 2**). Importantly, full-length IN presented the same trend of  
251 sensitivity for TAR structural mutants (**Supplementary Fig. 3a**). The presence of CT does not  
252 seem to be associated with a selective specificity of IN for TAR *in vitro*, as IN-CTD could bind  
253 efficiently to other structured RNAs regardless of the presence of CT. In particular, IN-CTD  
254 interacts with polyA, DIS, and SD/ $\Psi$  RNA elements of HIV-1 5'UTR (**Fig. 1d**). Consistently, the  $K_D$   
255 measured for IN interaction with all these gRNA elements has been shown to span a narrow range



256 of values <sup>8</sup>. The better affinity previously observed for the full-length IN <sup>8</sup> compared to IN-CTD  
257 measured in this work (**Fig. 1f** and **Supplementary Fig. 2b** and **c**) could be due to the presence  
258 of additional RNA binding sites within the NTD and CCD domains of full-length IN <sup>8</sup> and/or to  
259 differences in analytical techniques with respect to those employed here. Thus, the CT region can  
260 recognize a TAR RNA with the proper apical stem-loop conformation among possible structural  
261 defective TAR conformers, but it is not involved in the discrimination between viral structured RNA  
262 regions. Interestingly, this behavior of IN-CT reminds that of p6, the C-terminal domain of HIV-1  
263 Pr55<sup>Gag</sup> <sup>52</sup>. Pr55<sup>Gag</sup>Δp6 mutant, deleted of the p6 domain, showed no RNA binding specificity  
264 compared to the full lengths Pr55<sup>Gag</sup>, suggesting that the presence of this region is required for  
265 the specific binding of Pr55<sup>Gag</sup> to DIS RNA within the 5'UTR of HIV-1 genome <sup>52</sup>.

266 Previous biochemical and structural studies have demonstrated that unstructured Tat  
267 arginine-rich motif (ARM) penetrates in the TAR major groove made by stem-bulge-stem-loop  
268 secondary structures and mostly interacts with the U-rich bulge and nearby double-stranded  
269 regions (**Supplementary Fig. 5a**; <sup>38 53 54 55</sup>). Despite the absence in the CT of a motif comparable  
270 to the Arginine stretch of Tat, our results suggest that the unstructured IN-CT region also binds  
271 the TAR major groove, but through the interaction with G34 and, to a lesser extent G36, of the  
272 hexaloop (**Fig. 3a**). This could explain the lower affinity of IN-CTD for TAR mutants (**Fig. 2**): likely  
273 because the altered position of G34 and G36. Interestingly, in a recent report, the IN-CTD:TAR  
274 complex has been modeled on the base of the IN-CTD:INI1<sub>183-304</sub> structure, based on the fact that  
275 the same 6 residues were engaged for the binding of IN-CTD to INI1 and TAR (<sup>8,50</sup> **Supplementary**  
276 **Fig. 5b**). In this model, IN-CTD binds the minor groove of the 4-nt apical stem of TAR. Noteworthy,  
277 the last C-terminal modeled residue (D270), immediately preceding the CT tail, is oriented towards  
278 the major groove of TAR, which is consistent with our hypothesis (<sup>50</sup> **Supplementary Fig. 5b**).

279 The interaction of IN with gRNA has been shown to be critical for the proper localization of  
280 vRNP inside the protective capsid lattice <sup>8,25,26</sup>. In this context, the TAR-selection activity is exerted  
281 by IN-CT, while in the Pr160<sup>Gag-Pol</sup> precursor, could be an additional mechanism to that of the  
282 Pr55<sup>Gag</sup> protein interaction with the packaging signals (reviewed in <sup>56</sup>) in order to selectively recruit  
283 and encapsidate the HIV-1 gRNA in the viral core.

284 Our observations show how the interplay between IN, Tat and TAR RNA takes place: first  
285 IN-CTD binds TAR through its C-terminal tail by contacting the apical stem-loop and in particular  
286 the hexaloop. This interaction modifies the structure of TAR (**Fig. 3a**) favoring Tat binding (**Fig.**  
287 **3b** and **3c**), which finally displaces IN from the TAR RNA (**Fig. 4**). Noteworthy, the competition of  
288 Tat ARM with IN for TAR binding has also been reported elsewhere <sup>8</sup>. Our data are also fully

289 consistent with recent evidences of the implication of IN in the transcription of the provirus at early  
290 times after integration and in a Tat-independent manner <sup>32</sup>. The authors found that mutation of  
291 four lysine residues within the IN-CTD dramatically reduced proviral transcription since all of them  
292 are involved in the binding of IN to the viral RNA <sup>8,26</sup>.

293 Taken together, these *in vitro* observations suggest a working model in which IN would  
294 ensure the very first stages of proviral transcription (**Fig. 5**): IN-CTD, through to its CT tail,  
295 selectively binds to the nascent TAR transcript. This binding modifies the structure of TAR,  
296 facilitating its interaction with Tat. Therein Tat displaces IN and allows the subsequent  
297 transactivation of provirus transcription (**Fig. 5**). This process is dynamic and might also be  
298 modulated by post-translational modifications of IN, interaction with cellular partners and/or  
299 chromatin remodeling processes.

300 Interestingly, the structure of the HIV-1 intasome during the strand transfer process,  
301 revealed that the inner IN tetrameric core, which contacts both the viral and host DNA, is  
302 surrounded by twelve other subunits which display a considerable flexibility <sup>57</sup> and might be  
303 available for other functions. Unfortunately, the structure of IN after strand transfer is not yet  
304 available and the prediction of the presence of CTDs available for transcription is not possible so  
305 far.

306

## 307 **METHODS**

### 308 **Protein expression and purification**

309 Construction of plasmid pET15b, encoding N-terminal 6XHis tagged IN-CTD (aa 220-270) and IN-  
310 CTD- $\Delta$ CT (aa 220-288) were previously reported <sup>44</sup>. IN-FL gene from pNL4-3 were cloned in  
311 pPROEX-HTa vector in frame with 6XHis tag at N-terminus. All proteins were expressed in  
312 *Escherichia coli* BL21(DE3) Rosetta/pLysS strain (Novagen). Cells were grown in LB medium  
313 supplemented with 10% (w/v) glucose and protein expression was induced at an optical density  
314 at 600 nm (OD<sub>600</sub>) of 0.6 with 1 mM IPTG (isopropyl- $\beta$ -d-thiogalactopyranoside). Cells were  
315 incubated overnight at 18°C under continuous shaking, then pelleted. The cell pellets were  
316 resuspended in lysis buffer composed by 50 mM Tris-HCl pH 8, 1 M NaCl, 20 mM imidazole, 0.1  
317 mM EDTA, 2 mM  $\beta$ -mercaptoethanol and 10% (w/v) glycerol. Exclusively for bacterial lysis the  
318 buffer was freshly supplemented with 2M urea, 2 mM of Adenosine triphosphate (ATP), 5mM  
319 CHAPS (3-[(3-cholamidopropyl)dimethylammonio]-1-propanesulfonate) and 1 tablet of Protease  
320 Inhibitor Cocktail (ROCHE, cOmplete™). The preparation was sonicated for 120 s on ice, then the

321 resulting lysate was subjected to centrifugation at 11.000 *g* for 1h. The recovered supernatant was  
322 then applied to a HisTrap™ Fast Flow Crude column (Cytiva) and purified by AKTA pure system  
323 (Cytiva). The sample was first abundantly washed with lysis buffer containing 100 mM imidazole  
324 and 2M NaCl, then the protein was eluted using a gradient up to 500 mM imidazole in 10 column  
325 volumes. A second step of purification was carried out using a Superdex 75 10/300 GL column  
326 (Cytiva) by an isocratic elution carried out with storing buffer (50 mM HEPES pH 7.5, 1 M NaCl, 5  
327 mM β-mercaptoethanol , and 5% glycerol).

328 FlagIN-FL (IN-FLm) was expressed in Baby Hamster Kidney suspension cells (BHK21-C13-2P,  
329 Sigma-Aldrich) using a vaccinia virus expression system as previously described <sup>42</sup>.

330 IN-CT peptide (YGKQMAGDDCVASRQDED) and 101-residue long Tat protein of primary isolate  
331 133 of HIV-1 were chemically synthesized <sup>58 59</sup>. This Tat has been biochemically characterized and  
332 its full biological activity was previously validated <sup>60</sup>.

### 333 **In vitro RNA synthesis, purification, and radiolabeling.**

334 We produced several RNAs as listed in Table 1 by using partially double-stranded templates  
335 formed by hybridization of T7 promoter-containing DNA oligonucleotides listed in Table 2 and  
336 following the protocol detailed in <sup>61</sup>. Templates for polyA, DIS and SD/Psi RNAs were produced  
337 by PCR using pNL4-3 plasmid as template and T7 promoter-containing primers. RNA was  
338 transcribed by kit MEGAshortscript™ T7 (Thermo Fisher Scientific) following the manufacturer  
339 instructions, de-phosphorylated using Alkaline Phosphatase (New England Biolabs) and purified  
340 by phenol:chloroform:isoamyl alcohol (25:24:1) extraction and ethanol precipitation. The 3'  
341 biotinylated TAR and RNA 30-mer (Table 1) were chemically synthesized (Sigma Aldrich). RNA  
342 (50 pmol) was radiolabelled at 5' end with by using 10 units of T4 polynucleotide kinase (New  
343 England Biolabs) mixed to 3 μl of γ<sup>32</sup>P-ATP (3000 Ci/mmol 10 mCi/ml, Perkin Elmer) for 1h at  
344 37°C then purified on denaturing 10% (w/v) polyacrylamide gel (29:1) as previously described  
345 (Fiorini et al 2012). Before use in binding and structural studies, RNA was heated in refolding  
346 buffer (20 mM HEPES pH 7.5, 0.2 M NaCl, 2 mM MgCl<sub>2</sub>, 2 mM DTT) for 3 min at 95°C, followed  
347 by 40 min of slow controlled cooling to room temperature, and finally placed on ice.

### 348 **Electrophoretic Mobility Shift Assays (EMSA)**

349 The electrophoretic mobility shift assays (EMSA) were performed as described in <sup>62</sup>. Samples  
350 were prepared by mixing a radiolabelled RNA with increasing concentrations of proteins, as  
351 indicated, in a buffer containing 20 mM MES pH 6.0, 150 mM NaCl, 2 mM DTT, 2 mM MgCl<sub>2</sub>,  
352 0.2 μg BSA and 8% (v/v) PEG8000. The samples were incubated at 37 °C for 30 min before being

353 resolved by native 6% polyacrylamide (19:1) gel electrophoresis in 0.5x TAE (Tris acetate EDTA)  
354 buffer. Results were analysed by phosphorimaging using ImageQuant software. IN-FLm was  
355 incubated for 2h at 4°C with the RNA substrate. For dose-dependent competition assay showed  
356 in Fig. 4a, we used in all the samples a constant saturating IN-to-TAR concentrations with an IN-  
357 to-TAR ratio per sample exceeding about ten times their respective  $K_D$ . Then, we added increasing  
358 concentrations of Tat.

### 359 **RNA Structural probing**

360 Enzymatic treatments were performed in 10  $\mu$ l of reaction mix containing 0.5 pmol of 5'  
361 radiolabeled RNA, 0.2  $\mu$ g of yeast tRNA, 1  $\times$  Structure buffer (Thermo Fisher Scientific) and 0.01  
362 U of RNase T1 (Thermo Fisher Scientific). Incubation was done at 37°C for 5 min. Reactions were  
363 stopped by addition of 40  $\mu$ l of quenching buffer composed by 10 mM HEPES pH 7.5, 1 mM EDTA  
364 and 3% SDS. Partial alkaline hydrolysis was performed as follows: 10  $\mu$ l of reaction mix containing  
365 0.2 pmol of RNA, 1  $\mu$ g of yeast tRNA, 1 $\times$  Alkaline Hydrolysis buffer, were incubated at 95°C for  
366 12 min then quenched with 2x denaturing loading buffer and placed on ice and. For RNA/protein  
367 complexes, 0.5 pmol RNA was previously incubated with 36 pmol of protein at 37°C for 30 min  
368 then treated with RNase T1. After quenching, samples were phenol extracted and ethanol  
369 precipitated. After recovery from precipitation, all samples were run on a 15% sequencing  
370 polyacrylamide gel in 0.5  $\times$  TBE. (Tris Borate EDTA). Results were analysed by  
371 phosphorimaging.

### 372 **Pulldown assay**

373 The pulldown assays were conducted as described before<sup>61</sup>. Briefly, proteins were mixed in  
374 binding buffer (40 mM HEPES pH 7.5, 2.5 mM  $MgCl_2$ , 2mM  $\beta$ -mercaptoethanol and 5% glycerol)  
375 adjusting the final NaCl concentration to 150 mM. Samples were complemented or not with 600  
376 pmol of 3' end-biotinylated TAR (Table 1) in a final volume of 30  $\mu$ l, and incubated 30 min at 37  
377 °C. To the mix were added 8  $\mu$ l of magnetic streptavidin beads (Dynabeads MyOne, Thermo  
378 Fischer Scientific) and further incubated for 1h at 4°C in gentle rotation. The resin was washed  
379 three times with 500  $\mu$ l BB-200 (40 mM HEPES pH 7.5, 200 mM NaCl, 2.5 mM  $MgCl_2$ , 2mM  $\beta$ -  
380 mercaptoethanol and 10% glycerol) on ice and proteins were eluted with SDS loading buffer and  
381 analysed on polyacrylamide 16% (37.5:1) SDS-PAGE. For Histidine pulldown assay, magnetic  
382 streptavidin resin was replaced with HisPur™ Ni-NTA Magnetic Beads and protein elution was  
383 done with 0.5 M -Imidazole containing buffer.

### 384 **Bio-Layer interferometry**

385 For Bio-Layer Interferometry (BLI) analysis we used the BLItz platform (FortéBio). For high  
386 throughput experiments such as shown in Fig. 1 and Supplementary Fig. 2e we used the Octet  
387 RED96e System (FortéBio). All Measurements were performed in assay buffer composed of 50  
388 mM Hepes pH 7.5, 200 mM NaCl, 2 mM  $\beta$ -mercaptoethanol, 5% glycerol, 2 mM  $MgCl_2$ , 1  $\mu$ M  
389  $ZnSO_4$ , 0.5 M BSA. For BLItz platform we used Streptavidin (SA) Biosensors (FortéBio) and for  
390 Octet RED96e the Streptavidin (SAX) Biosensors (FortéBio) that were hydrated for 10 min in  
391 assay buffer then plunged in a solution containing 1  $\mu$ M 3' end-biotinylated TAR RNA in assay  
392 buffer with 1x RNAase inhibitor (RNA Secure, Invitrogen) and 0.1  $\mu$ M BSA for the RNA loading  
393 step. A wash was performed after RNA loading. In BLItz experiment the association of the protein  
394 to RNA was monitored in real-time for 200 s: the hydrated biosensor tip was placed in a 1.5 ml  
395 black assay tube containing 200  $\mu$ l of protein solution in assay buffer as indicated. Afterward, a  
396 dissociation step or a second association with Tat, was performed for 200 s. Biosensors were  
397 discarded after each measurement. All kinetic assays showed in Fig. 1 and Supplementary Fig.  
398 2e were performed using Octet RED96e system and carried out using black 96-well plates and  
399 samples were diluted in freshly prepared assay buffer and incubated at 37°C with an orbital shake.  
400 Association and dissociation steps were as in the BLItz experiments. Each time reference sensors  
401 and negative control sensors were included. Sensorgrams were exported and data analysis was  
402 performed with Kaleida Graph software (Synergy Software).

403

#### 404 **Acknowledgements**

405 This work was supported by the French Agency for Research on AIDS and Viral Hepatitis  
406 (ECTZ72240-1 to F.F., M.R. and M.N.; PhD fellowship for C.R.). We acknowledge: the support  
407 and the use of resources of the French Infrastructure for Integrated Structural Biology FRISBI  
408 ANR-10-INBS-05 and of Instruct-ERIC; Sylvie Ricard-Blum and the Interaction platform of the  
409 UMR 5246 ICBMS for the experiments on the Octet RED96e; the Protein Science Facility (PSF)  
410 of SFR Biosciences (UAR3444/CNRS, US8/Inserm, ENS de Lyon, UCBL) especially Virginie  
411 Gueguen-Chaignon and Eric Desis for their assistance, and Frédéric Galisson for the help with  
412 radioactive sources. We are grateful to the Viral DNA Integration and Chromatin Dynamics  
413 Network (DyNAVIR) for fruitful discussions and to Anne-Catherine Dock-Bregeon for critical reading  
414 of the manuscript. We acknowledge Andrea Cimorelli for the pNL4-3 plasmid donation.

415

## 416 **Author Contributions**

417 C.R., C.L., and F.F. conceived and designed experiments. C.R., C.L., A.E.M., C.G., L.B. D.L. and  
418 F.F. performed the experiments and/or analyzed data. J.B. and M.R. prepared protein from  
419 mammalian expression system; C.R., C.L., A.E.M., C.G., L.B. D.L, M.N., M.R., P.G and. F.F.  
420 discussed the results; F.F. wrote the paper. All authors read and edited the manuscript.

421

## 422 **Competing Interests statement**

423 The authors declare no competing interests.

424

## 425 **References**

- 426 1. Castello, A. et al. Insights into RNA biology from an atlas of mammalian mRNA-binding proteins.  
427 *Cell* **149**, 1393-406 (2012).
- 428 2. Beckmann, B.M., Castello, A. & Medenbach, J. The expanding universe of ribonucleoproteins: of  
429 novel RNA-binding proteins and unconventional interactions. *Pflugers Arch* **468**, 1029-40 (2016).
- 430 3. Hentze, M.W., Castello, A., Schwarzl, T. & Preiss, T. A brave new world of RNA-binding proteins.  
431 *Nat Rev Mol Cell Biol* **19**, 327-341 (2018).
- 432 4. Cassidy, L.A. & Maher, L.J., 3rd. Having it both ways: transcription factors that bind DNA and  
433 RNA. *Nucleic Acids Res* **30**, 4118-26 (2002).
- 434 5. Brodsky, S. et al. Intrinsically Disordered Regions Direct Transcription Factor In Vivo Binding  
435 Specificity. *Mol Cell* **79**, 459-471 e4 (2020).
- 436 6. Garcia-Moreno, M., Jarvelin, A.I. & Castello, A. Unconventional RNA-binding proteins step into  
437 the virus-host battlefront. *Wiley Interdiscip Rev RNA* **9**, e1498 (2018).
- 438 7. Basu, S. & Bahadur, R.P. A structural perspective of RNA recognition by intrinsically disordered  
439 proteins. *Cell Mol Life Sci* **73**, 4075-84 (2016).
- 440 8. Kessler, J.J. et al. HIV-1 Integrase Binds the Viral RNA Genome and Is Essential during Virion  
441 Morphogenesis. *Cell* **166**, 1257-1268 e12 (2016).
- 442 9. Maertens, G.N., Engelman, A.N. & Cherepanov, P. Structure and function of retroviral integrase.  
443 *Nat Rev Microbiol* (2021).
- 444 10. Sakai, H. et al. Integration is essential for efficient gene expression of human immunodeficiency  
445 virus type 1. *J Virol* **67**, 1169-74 (1993).
- 446 11. Esposito, D. & Craigie, R. HIV integrase structure and function. *Adv Virus Res* **52**, 319-33 (1999).
- 447 12. Dyda, F. et al. Crystal structure of the catalytic domain of HIV-1 integrase: similarity to other  
448 polynucleotidyl transferases. *Science* **266**, 1981-6 (1994).
- 449 13. Zheng, R., Jenkins, T.M. & Craigie, R. Zinc folds the N-terminal domain of HIV-1 integrase,  
450 promotes multimerization, and enhances catalytic activity. *Proc Natl Acad Sci U S A* **93**, 13659-64  
451 (1996).
- 452 14. Cai, M. et al. Solution structure of the N-terminal zinc binding domain of HIV-1 integrase. *Nat*  
453 *Struct Biol* **4**, 567-77 (1997).
- 454 15. Lee, S.P., Xiao, J., Knutson, J.R., Lewis, M.S. & Han, M.K. Zn<sup>2+</sup> promotes the self-association of  
455 human immunodeficiency virus type-1 integrase in vitro. *Biochemistry* **36**, 173-80 (1997).

- 456 16. Eijkelenboom, A.P. et al. The DNA-binding domain of HIV-1 integrase has an SH3-like fold. *Nat*  
457 *Struct Biol* **2**, 807-10 (1995).
- 458 17. Woerner, A.M. & Marcus-Sekura, C.J. Characterization of a DNA binding domain in the C-  
459 terminus of HIV-1 integrase by deletion mutagenesis. *Nucleic Acids Res* **21**, 3507-11 (1993).
- 460 18. Engelman, A., Hickman, A.B. & Craigie, R. The core and carboxyl-terminal domains of the  
461 integrase protein of human immunodeficiency virus type 1 each contribute to nonspecific DNA  
462 binding. *J Virol* **68**, 5911-7 (1994).
- 463 19. Jenkins, T.M., Engelman, A., Ghirlando, R. & Craigie, R. A soluble active mutant of HIV-1  
464 integrase: involvement of both the core and carboxyl-terminal domains in multimerization. *J Biol*  
465 *Chem* **271**, 7712-8 (1996).
- 466 20. Lutzke, R.A., Vink, C. & Plasterk, R.H. Characterization of the minimal DNA-binding domain of the  
467 HIV integrase protein. *Nucleic Acids Res* **22**, 4125-31 (1994).
- 468 21. Dar, M.J. et al. Biochemical and virological analysis of the 18-residue C-terminal tail of HIV-1  
469 integrase. *Retrovirology* **6**, 94 (2009).
- 470 22. De Houwer, S. et al. Identification of residues in the C-terminal domain of HIV-1 integrase that  
471 mediate binding to the transportin-SR2 protein. *J Biol Chem* **287**, 34059-68 (2012).
- 472 23. Mauro, E. et al. Human H4 tail stimulates HIV-1 integration through binding to the carboxy-  
473 terminal domain of integrase. *Nucleic Acids Res* **47**, 3607-3618 (2019).
- 474 24. Vink, C., Oude Groeneger, A.M. & Plasterk, R.H. Identification of the catalytic and DNA-binding  
475 region of the human immunodeficiency virus type I integrase protein. *Nucleic Acids Res* **21**, 1419-  
476 25 (1993).
- 477 25. Madison, M.K. et al. Allosteric HIV-1 Integrase Inhibitors Lead to Premature Degradation of the  
478 Viral RNA Genome and Integrase in Target Cells. *J Virol* **91**(2017).
- 479 26. Elliott, J.L. et al. Integrase-RNA interactions underscore the critical role of integrase in HIV-1  
480 virion morphogenesis. *Elife* **9**(2020).
- 481 27. Elliott, J.L. & Kutluay, S.B. Going beyond Integration: The Emerging Role of HIV-1 Integrase in  
482 Virion Morphogenesis. *Viruses* **12**(2020).
- 483 28. Fontana, J. et al. Distribution and Redistribution of HIV-1 Nucleocapsid Protein in Immature,  
484 Mature, and Integrase-Inhibited Virions: a Role for Integrase in Maturation. *J Virol* **89**, 9765-80  
485 (2015).
- 486 29. Cereseto, A. et al. Acetylation of HIV-1 integrase by p300 regulates viral integration. *EMBO J* **24**,  
487 3070-81 (2005).
- 488 30. Manganaro, L. et al. Concerted action of cellular JNK and Pin1 restricts HIV-1 genome integration  
489 to activated CD4+ T lymphocytes. *Nat Med* **16**, 329-33 (2010).
- 490 31. Zamborlini, A. et al. Impairment of human immunodeficiency virus type-1 integrase SUMOylation  
491 correlates with an early replication defect. *J Biol Chem* **286**, 21013-22 (2011).
- 492 32. Winans, S. & Goff, S.P. Mutations altering acetylated residues in the CTD of HIV-1 integrase cause  
493 defects in proviral transcription at early times after integration of viral DNA. *PLoS Pathog* **16**,  
494 e1009147 (2020).
- 495 33. Jonkers, I. & Lis, J.T. Getting up to speed with transcription elongation by RNA polymerase II. *Nat*  
496 *Rev Mol Cell Biol* **16**, 167-77 (2015).
- 497 34. Mousseau, G. & Valente, S.T. Role of Host Factors on the Regulation of Tat-Mediated HIV-1  
498 Transcription. *Curr Pharm Des* **23**, 4079-4090 (2017).
- 499 35. Schulze-Gahmen, U. & Hurley, J.H. Structural mechanism for HIV-1 TAR loop recognition by Tat  
500 and the super elongation complex. *Proc Natl Acad Sci U S A* **115**, 12973-12978 (2018).
- 501 36. Sobhian, B. et al. HIV-1 Tat assembles a multifunctional transcription elongation complex and  
502 stably associates with the 7SK snRNP. *Mol Cell* **38**, 439-51 (2010).

- 503 37. He, N. et al. HIV-1 Tat and host AFF4 recruit two transcription elongation factors into a  
504 bifunctional complex for coordinated activation of HIV-1 transcription. *Mol Cell* **38**, 428-38  
505 (2010).
- 506 38. Pham, V.V. et al. HIV-1 Tat interactions with cellular 7SK and viral TAR RNAs identifies dual  
507 structural mimicry. *Nat Commun* **9**, 4266 (2018).
- 508 39. Wei, P., Garber, M.E., Fang, S.M., Fischer, W.H. & Jones, K.A. A novel CDK9-associated C-type  
509 cyclin interacts directly with HIV-1 Tat and mediates its high-affinity, loop-specific binding to TAR  
510 RNA. *Cell* **92**, 451-62 (1998).
- 511 40. Ne, E., Palstra, R.J. & Mahmoudi, T. Transcription: Insights From the HIV-1 Promoter. *Int Rev Cell*  
512 *Mol Biol* **335**, 191-243 (2018).
- 513 41. Craigie, R. The molecular biology of HIV integrase. *Future Virol* **7**, 679-686 (2012).
- 514 42. Levy, N. et al. Production of unstable proteins through the formation of stable core complexes.  
515 *Nat Commun* **7**, 10932 (2016).
- 516 43. Eijkelenboom, A.P. et al. Refined solution structure of the C-terminal DNA-binding domain of  
517 human immunovirus-1 integrase. *Proteins* **36**, 556-64 (1999).
- 518 44. Kanja, M. et al. NKNK: a New Essential Motif in the C-Terminal Domain of HIV-1 Group M  
519 Integrases. *J Virol* **94**(2020).
- 520 45. Lodi, P.J. et al. Solution structure of the DNA binding domain of HIV-1 integrase. *Biochemistry* **34**,  
521 9826-33 (1995).
- 522 46. Berkhout, B. & Jeang, K.T. Detailed mutational analysis of TAR RNA: critical spacing between the  
523 bulge and loop recognition domains. *Nucleic Acids Res* **19**, 6169-76 (1991).
- 524 47. Churcher, M.J. et al. High affinity binding of TAR RNA by the human immunodeficiency virus  
525 type-1 tat protein requires base-pairs in the RNA stem and amino acid residues flanking the basic  
526 region. *J Mol Biol* **230**, 90-110 (1993).
- 527 48. Roy, S., Delling, U., Chen, C.H., Rosen, C.A. & Sonenberg, N. A bulge structure in HIV-1 TAR RNA is  
528 required for Tat binding and Tat-mediated trans-activation. *Genes Dev* **4**, 1365-73 (1990).
- 529 49. Delling, U. et al. Conserved nucleotides in the TAR RNA stem of human immunodeficiency virus  
530 type 1 are critical for Tat binding and trans activation: model for TAR RNA tertiary structure. *J*  
531 *Virol* **66**, 3018-25 (1992).
- 532 50. Dixit, U. et al. INI1/SMARCB1 Rpt1 domain mimics TAR RNA in binding to integrase to facilitate  
533 HIV-1 replication. *Nat Commun* **12**, 2743 (2021).
- 534 51. Lu, R., Ghory, H.Z. & Engelman, A. Genetic analyses of conserved residues in the carboxyl-  
535 terminal domain of human immunodeficiency virus type 1 integrase. *J Virol* **79**, 10356-68 (2005).
- 536 52. Dubois, N. et al. The C-terminal p6 domain of the HIV-1 Pr55(Gag) precursor is required for  
537 specific binding to the genomic RNA. *RNA Biol* **15**, 923-936 (2018).
- 538 53. Puglisi, J.D., Tan, R., Calnan, B.J., Frankel, A.D. & Williamson, J.R. Conformation of the TAR RNA-  
539 arginine complex by NMR spectroscopy. *Science* **257**, 76-80 (1992).
- 540 54. Weeks, K.M., Ampe, C., Schultz, S.C., Steitz, T.A. & Crothers, D.M. Fragments of the HIV-1 Tat  
541 protein specifically bind TAR RNA. *Science* **249**, 1281-5 (1990).
- 542 55. Cordingley, M.G. et al. Sequence-specific interaction of Tat protein and Tat peptides with the  
543 transactivation-responsive sequence element of human immunodeficiency virus type 1 in vitro.  
544 *Proc Natl Acad Sci U S A* **87**, 8985-9 (1990).
- 545 56. Comas-Garcia, M., Davis, S.R. & Rein, A. On the Selective Packaging of Genomic RNA by HIV-1.  
546 *Viruses* **8**(2016).
- 547 57. Passos, D.O. et al. Cryo-EM structures and atomic model of the HIV-1 strand transfer complex  
548 intasome. *Science* **355**, 89-92 (2017).



- 549 58. Guillon, C., Stankovic, K., Ataman-Onal, Y., Biron, F. & Verrier, B. Evidence for CTL-mediated  
550 selection of Tat and Rev mutants after the onset of the asymptomatic period during HIV type 1  
551 infection. *AIDS Res Hum Retroviruses* **22**, 1283-92 (2006).
- 552 59. Mayol, K., Munier, S., Beck, A., Verrier, B. & Guillon, C. Design and characterization of an HIV-1  
553 Tat mutant: inactivation of viral and cellular functions but not antigenicity. *Vaccine* **25**, 6047-60  
554 (2007).
- 555 60. Foucault, M. et al. UV and X-ray structural studies of a 101-residue long Tat protein from a HIV-1  
556 primary isolate and of its mutated, detoxified, vaccine candidate. *Proteins* **78**, 1441-56 (2010).
- 557 61. Fiorini, F., Bonneau, F. & Le Hir, H. Biochemical characterization of the RNA helicase UPF1  
558 involved in nonsense-mediated mRNA decay. *Methods Enzymol* **511**, 255-74 (2012).
- 559 62. Fiorini, F., Boudvillain, M. & Le Hir, H. Tight intramolecular regulation of the human Upf1 helicase  
560 by its N- and C-terminal domains. *Nucleic Acids Res* **41**, 2404-15 (2013).
- 561 63. Gruber, A.R., Lorenz, R., Bernhart, S.H., Neubock, R. & Hofacker, I.L. The Vienna RNA websuite.  
562 *Nucleic Acids Res* **36**, W70-4 (2008).
- 563 64. Lorenz, R. et al. ViennaRNA Package 2.0. *Algorithms Mol Biol* **6**, 26 (2011).
- 564 65. Robert, X. & Gouet, P. Deciphering key features in protein structures with the new ENDscript  
565 server. *Nucleic Acids Res* **42**, W320-4 (2014).
- 566 66. Muller-Esparza, H., Osorio-Valeriano, M., Steube, N., Thanbichler, M. & Randau, L. Bio-Layer  
567 Interferometry Analysis of the Target Binding Activity of CRISPR-Cas Effector Complexes. *Front*  
568 *Mol Biosci* **7**, 98 (2020).

569

570

571 **Figure 1:** IN binds to structured RNA. **a** Schematic diagram showing the domain  
572 organization of IN: the N-terminal domain (NTD), the catalytic core domain (CCD) and the C-  
573 terminal domain (CTD) are indicated respectively in green, orange and blue rectangles.  
574 Recombinant protein versions used in our study are represented by grey lines: IN full-length from  
575 mammalian expression system (IN-FLm); IN full-length from *E. coli* (IN-FL); IN-CTD (residues 222  
576 to 288); IN-CTD- $\Delta$ CT (222 to 270); IN-CT (270 to 288). Sites of phosphorylation (P) and  
577 acetylation (Ac) are shown in red. **b** Structural model of TAR RNA obtained with RNA Fold  
578 WebServer<sup>63 64</sup> predicting a minimum free energy of -29.60 kcal/mol. **c** Representative native 6%  
579 polyacrylamide gel illustrating the Electrophoretic mobility shift assay (EMSA) showing the  
580 interaction of IN-FLm with TAR RNA or an unstructured RNA 50-mer (AG<sub>(50)</sub>-mer) labelled with <sup>32</sup>P  
581 (black star). The RNA substrates (50 nM) were incubated with various concentrations of IN-FLm  
582 or without protein (TAR RNA: 0; 100, 200, 400 nM of IN-FLm; AG<sub>(50)</sub>-mer RNA: 0 or 400 nM of IN-  
583 FLm). **d** Models of secondary structures of four RNA elements belonging to 5' untranslated region  
584 of the HIV-1 RNA genome: TAR, Poly-A, DIS and SD/Psi (upper panel). EMSA assay showing the  
585 binding of IN-CTD to these RNA elements (lower panel). Increasing amounts of IN-CTD (0; 100;  
586 200; 400 nM) were incubated with 5'-end radiolabeled RNA (50nM). **e** Sequence alignment of the  
587 C-terminal extremity of IN-CTD from HIV-1 subtypes and simian viruses. All amino acid sequences

588 were obtained from the HIV database compendium (<http://www.hiv.lanl.gov/>) and aligned using  
589 Clustal Omega (<https://www.ebi.ac.uk/Tools/msa/clustalo/>) in order to have a consensus  
590 sequence for each viral subtype. Consensus sequences from subtypes A1, B, C, G, N, O and from  
591 GOR and CPZ, were aligned and analyzed by ESPript 3.0 Web server<sup>65</sup>. Secondary structure  
592 elements from IN-CTD- ΔCT structure (PDB code: 5TC2) were presented on top of the alignment  
593 (helices with squiggles and strands with arrows). Red shading indicates sequence identity and  
594 boxes indicate sequence similarity, according to physical-chemical properties. **f** top: Schematic  
595 representation of the Bio-Layer interferometry (BLI) experiment showing the binding of IN (grey  
596 ellipses) to 5'-biotinylated TAR RNA immobilized on streptavidin-coated biosensor; bottom: graph  
597 showing the wavelength shifts recorded at 200 s after the start of the protein/RNA binding were  
598 plotted against the corresponding IN-CTD-ΔCT (blue line, squares) and IN-CTD (red line, circles)  
599 concentrations, in order to calculate the respective equilibrium dissociation constant ( $K_D$ ) values.  
600 Data points were fitted to the equation:  $Y = B_{max} * X/(Kd+X)+NS*X$  where  $B_{max}$  is the maximum  
601 wavelength shift and NS the slope of the non-linear component as described in<sup>66</sup>. The coefficients  
602 of determination ( $R^2$ ) and equilibrium dissociation constant ( $K_D$ ) values obtained are indicated in  
603 the graph for each IN fragment. Binding assays were performed in duplicate. Error bars indicate  
604 the Standard Error of the Mean.

605

606 **Figure 2.** IN C-terminal tail sensing for TAR RNA apical stem-loop shape. **a** Structural  
607 model of TAR RNA and mutated versions used in our study: TAR long stem (TAR-LS), TAR short  
608 stem (TAR-SS) and TAR very short stem (TAR-VSS). In order to verify that each RNA mutant  
609 assumed the expected secondary structure each model was analyzed with Fold WebServer<sup>63,64</sup>  
610 **b** EMSA assay illustrating the interaction of IN-CTD and IN-CTD-ΔCT with TAR wild type and  
611 mutants. The RNA substrates (50 nM) are labelled with <sup>32</sup>P (black star) and incubated with  
612 increasing concentrations of proteins (0; 100, 200, 400 and 800 nM) under the conditions  
613 described in 'Materials and Methods' section. **c** Graph showing the fractions of RNA bound by IN  
614 as a function of IN concentration. Data points (Mean ± SD) derived from four independent  
615 experiments. Data were fitted with Kaleida Graph (Synergy software) to Michaelis-Menten  
616 equation.

617

618 **Figure 3.** IN induces structural modifications of TAR, promoting Tat binding. **a** Structure  
619 probing of the secondary structure of TAR RNA complexed with different fragments of IN and Tat.

620 5'-end radiolabeled TAR (34-mer) was incubated in the presence or absence of protein for 30 min  
621 at 37 °C prior to RNase T1 treatment, as described in experimental procedures. RNA fragments  
622 were separated on a 15% denaturing polyacrylamide sequencing gel. Bands corresponding to  
623 certain T1 cleavage (at G bases) products are identified as position markers. Probing gel lanes  
624 are as follows: (M) Ladder of two RNA transcripts of 33 and 20 nucleotides in length (lane 1);  
625 (AC(40) AH) alkaline ladder of AC<sub>(40)</sub>-mer RNA (lane 2); TAR native (lane3); TAR RNA complexes  
626 with IN-CT (lane 4); IN-CTD-ΔCT (lane 5); IN-CTD (lane 6) and Tat (lane 7). Digestion patterns  
627 were mapped on TAR secondary structure depicted on the right of the gel: circles identify  
628 nucleotides protected from RNase T1 digestion and arrows mark the RNA cleavage sites. Grey  
629 arrows indicated nonspecific hydrolysis. The dimensions of arrows are proportional to the intensity  
630 of the band. **b** Real-time measurements of protein-RNA interaction obtained using Interferometry  
631 assays (BLItz<sup>®</sup> System instrument- FortéBio). The 3' biotinylated TAR (Bt-TAR) was first loaded  
632 on the streptavidin-coated biosensor for 100 s (Bt-association) then the unbound RNA was  
633 washed for 50 s (baseline). The sensor was absorbed in a solution containing about 90 μM of IN  
634 protein for 200 s than incubated with different concentrations of Tat (0.2, 0.5, 1 and 2 μM) for 200  
635 s. **c** Graph showing the wavelength shifts recorded 200 s after Tat addition (at 600 s of kinetics)  
636 normalized on the minimum wavelength shifts measured at the moment of Tat addition (400 s),  
637 as a function of the corresponding Tat concentrations. Data points were fitted with Hill equation:  
638  $y = B_{max} x^n / K_D + (x^n)$ . **d** BLI experiment to measure the affinity of Tat for immobilized Bt-TAR RNA:  
639 graph showing the wavelength shifts recorded after 200 s after the start of the protein/RNA binding  
640 were plotted against the corresponding Tat concentrations. Data points were fitted with Michaelis-  
641 Menten equation and R<sup>2</sup> and K<sub>D</sub> values were shown in the graphs inset.

642

643 **Figure 4.** Tat competes with IN-CTD for TAR binding. **a** EMSA assay showing a dose-  
644 dependent competition assay of Tat on IN-CTD/TAR or IN-CTD-ΔCT/TAR complexes.  
645 Radiolabeled TAR (50 nM) was incubated with 16 fold molar excess of IN-CTD (lanes 2-6) or IN-  
646 CTD-ΔCT (lanes 8-12) with or without increasing concentration of Tat (25, 50, 100, 200 nM ). Tat  
647 vs IN-CTD is shown in lanes 3-6 and IN-CTD-ΔCT in lanes 9-12. Control binding of Tat on TAR  
648 was also performed using Tat alone (lanes 13-17). **b** Protein co-precipitation with 3' end-  
649 biotinylated TAR (Bt-TAR). IN-CTD (lanes 1-4) or IN-CTD-ΔCT (lanes 5 and 8) were mixed with  
650 increasing amount of Tat (1, 2, 3 μg/sample; lanes 2, 3, 4 and 6, 7, 8) and incubated in a buffer  
651 containing 200 mM NaCl before co-precipitation. Tat was incubated with Bt-TAR alone (lane 9) or

652 TAR-free beads as a control for unspecific binding (lane 10). Input (20% of total) and pull-down  
653 fractions were analyzed by 15% SDS-PAGE followed by Coomassie blue staining.

654

655 **Figure 5.** Working Model proposed for the interplay of IN-CTD, Tat and TAR during the  
656 early state of HIV-1 proviral transcription. Once the integration has taken place, IN interacts with  
657 nascent TAR transcript through its CTD, directly interacting with the major groove and the  
658 hexaloop, thanks to its C-terminal tail. The binding induces TAR conformational changes, which  
659 promote the interaction of Tat with its substrate. Afterwards, Tat displaces IN-CTD from TAR and  
660 recruits the SEC complex in order to boost Pol II transcription.

661

662

663

664

665

## Figure 1

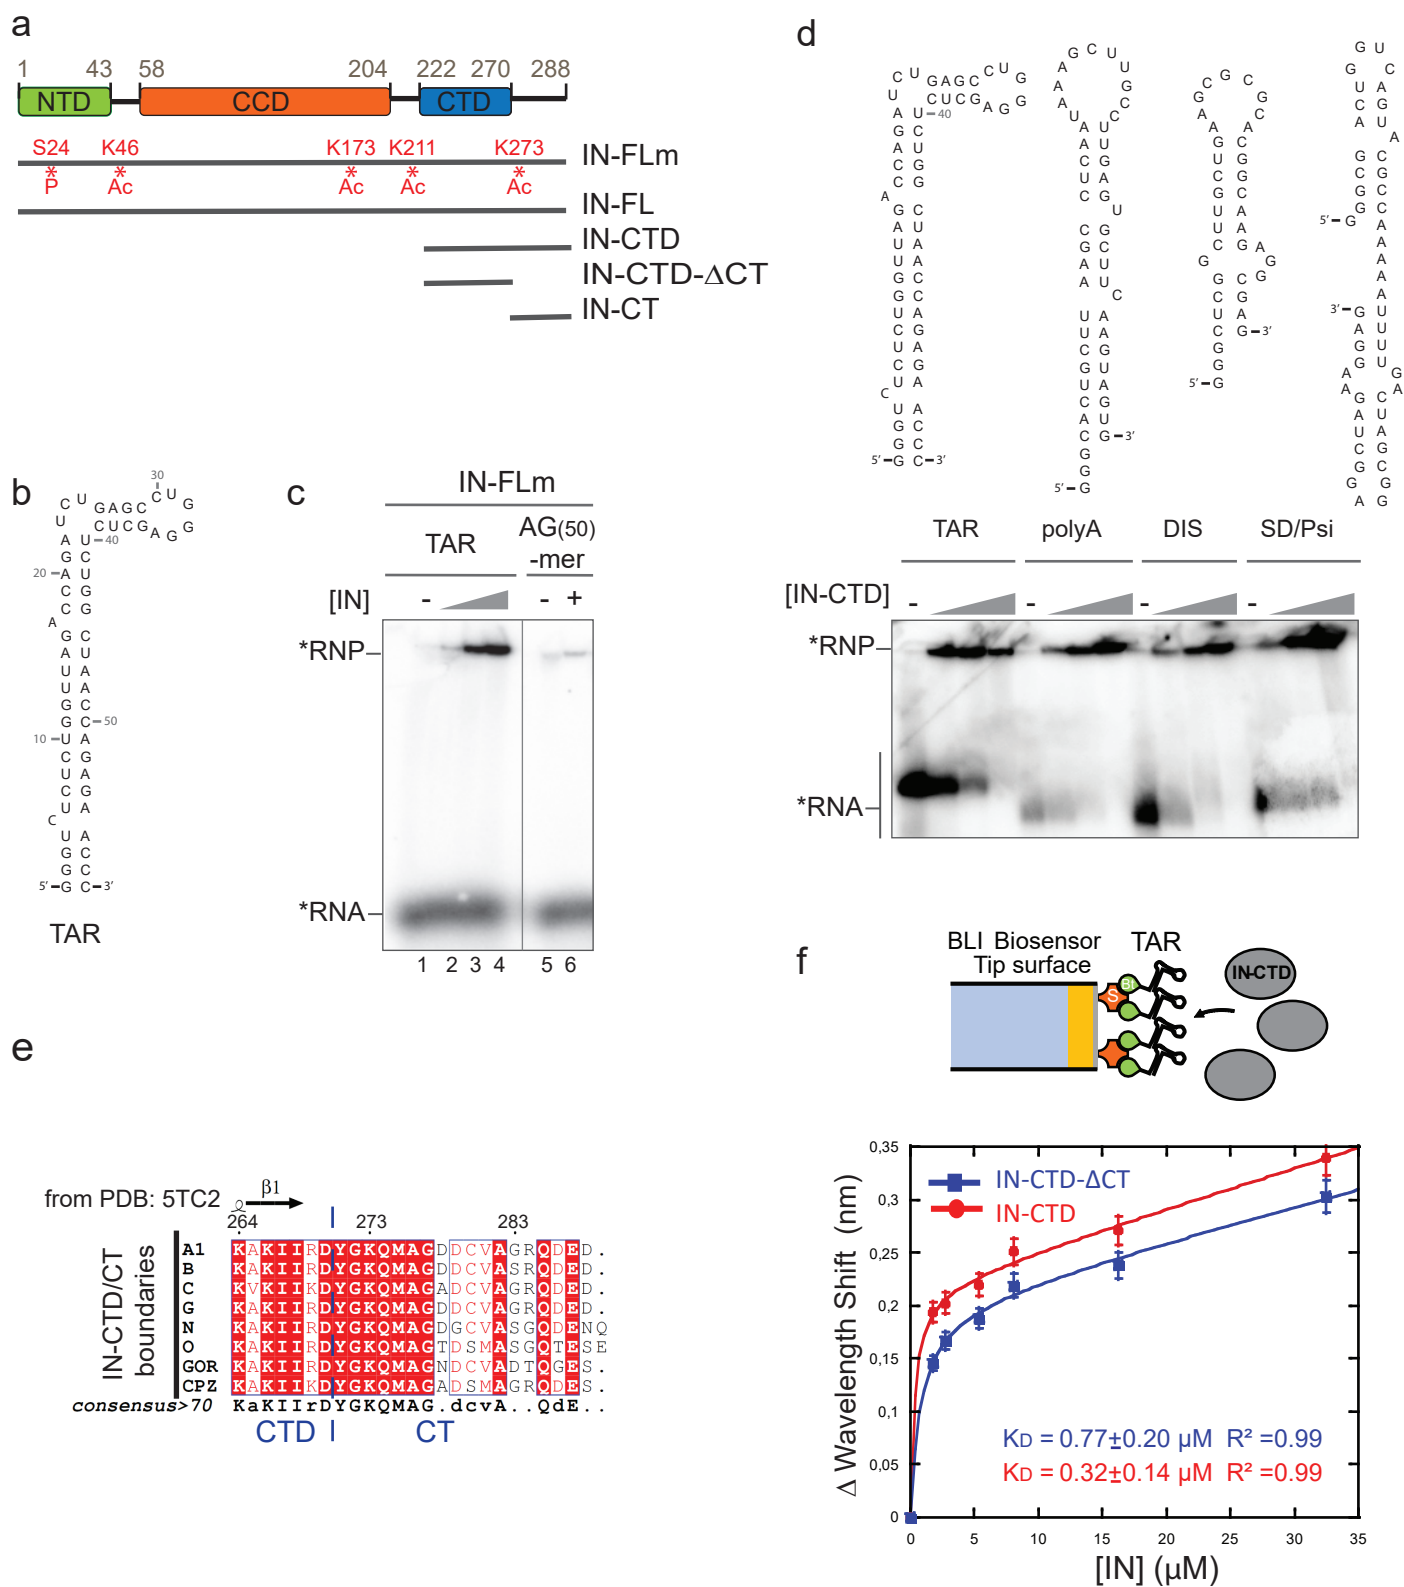

## Figure 2

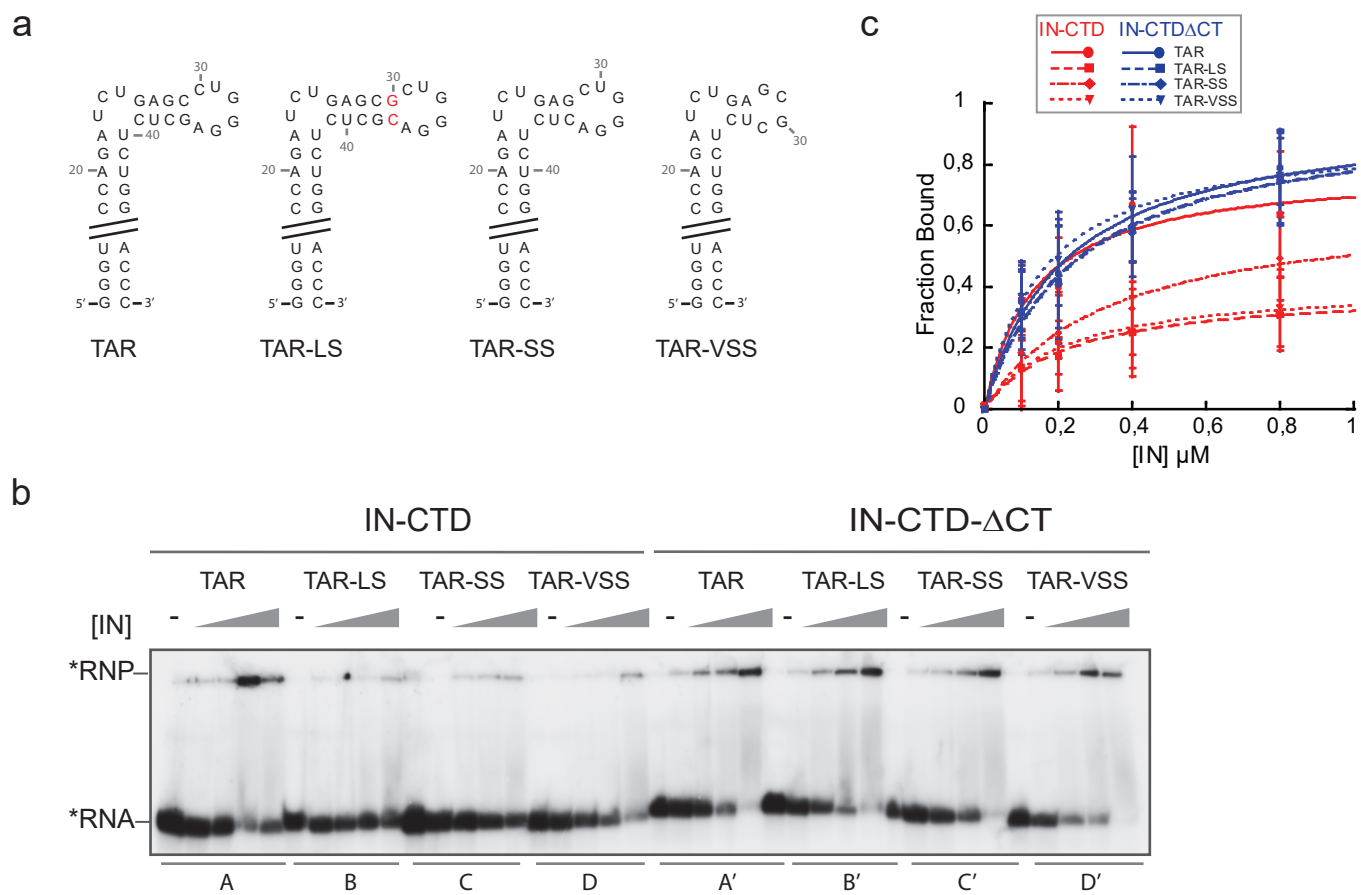

## Figure 3

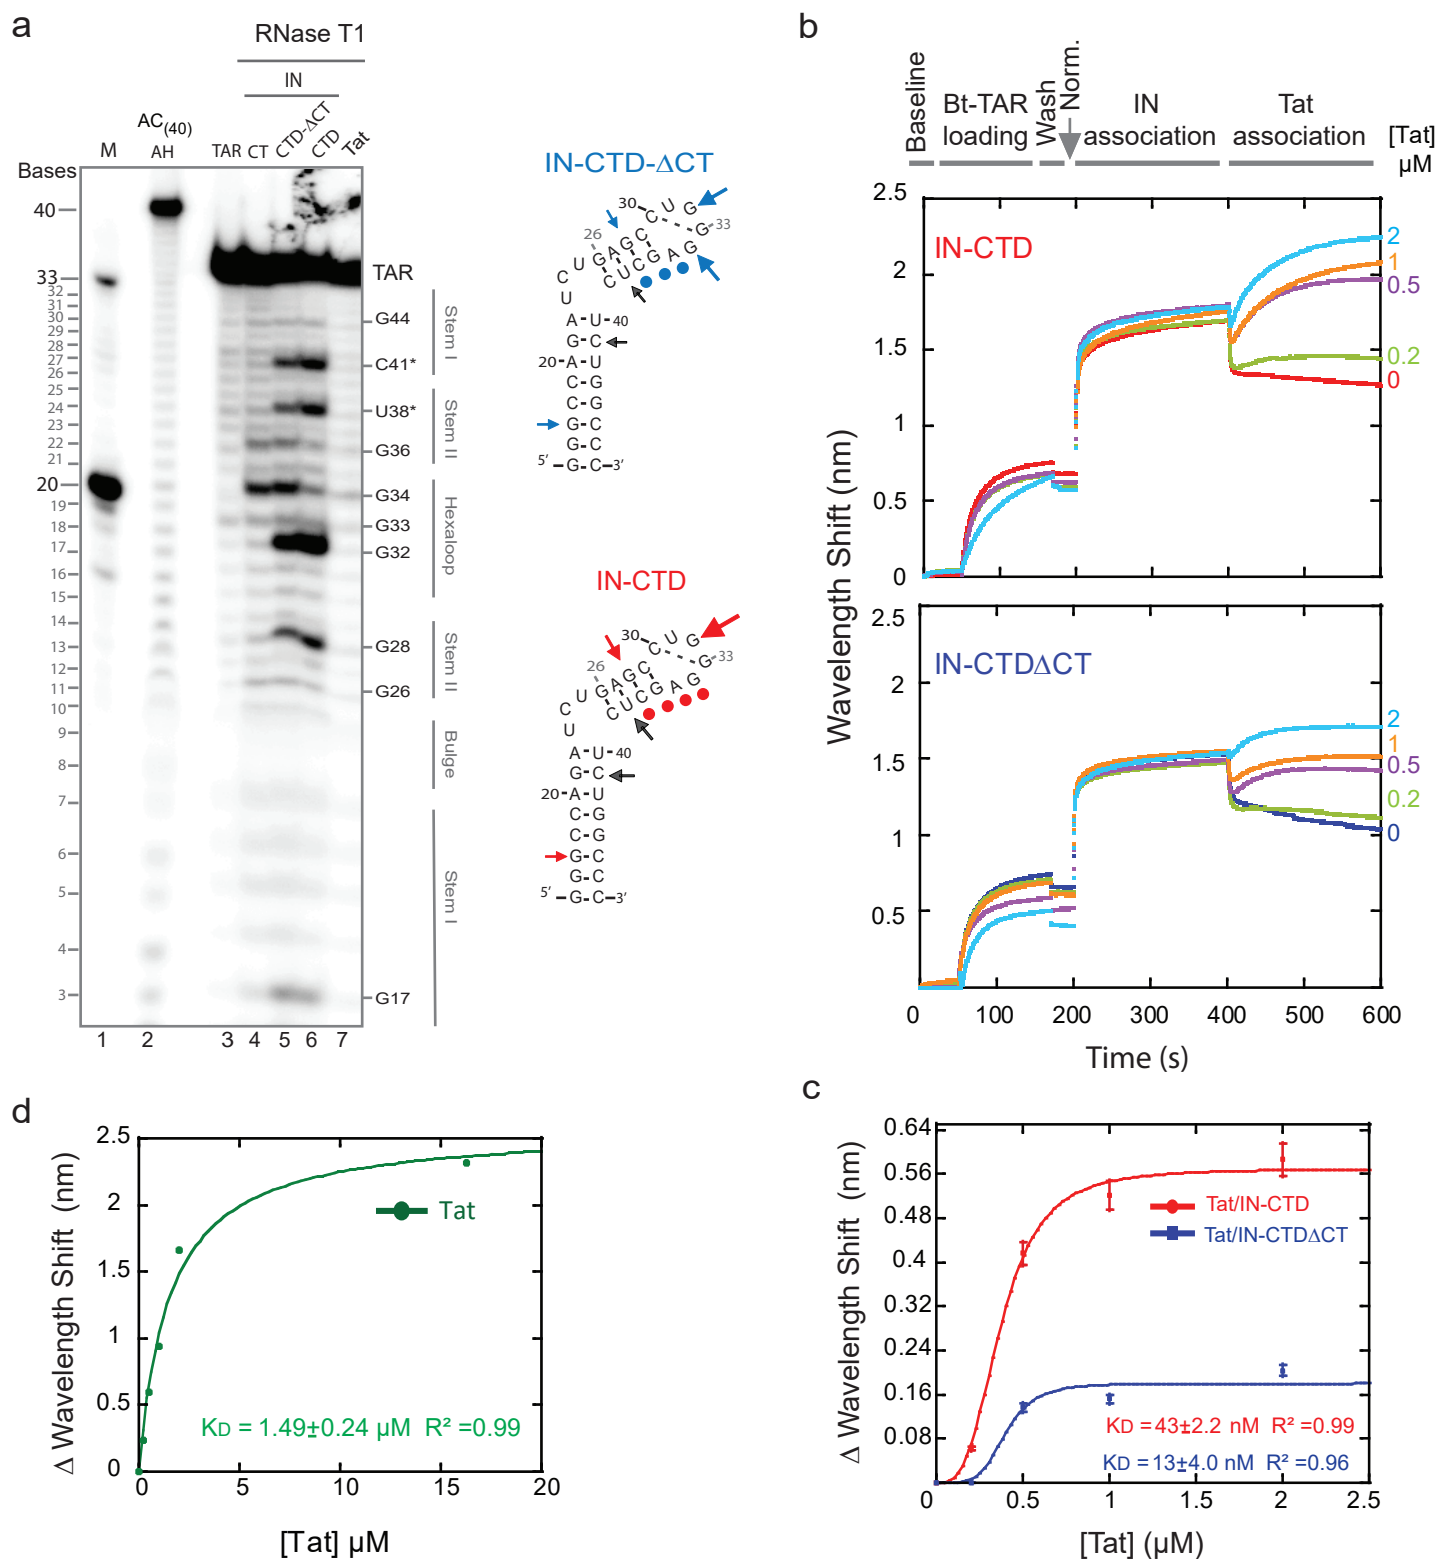

## Figure 4

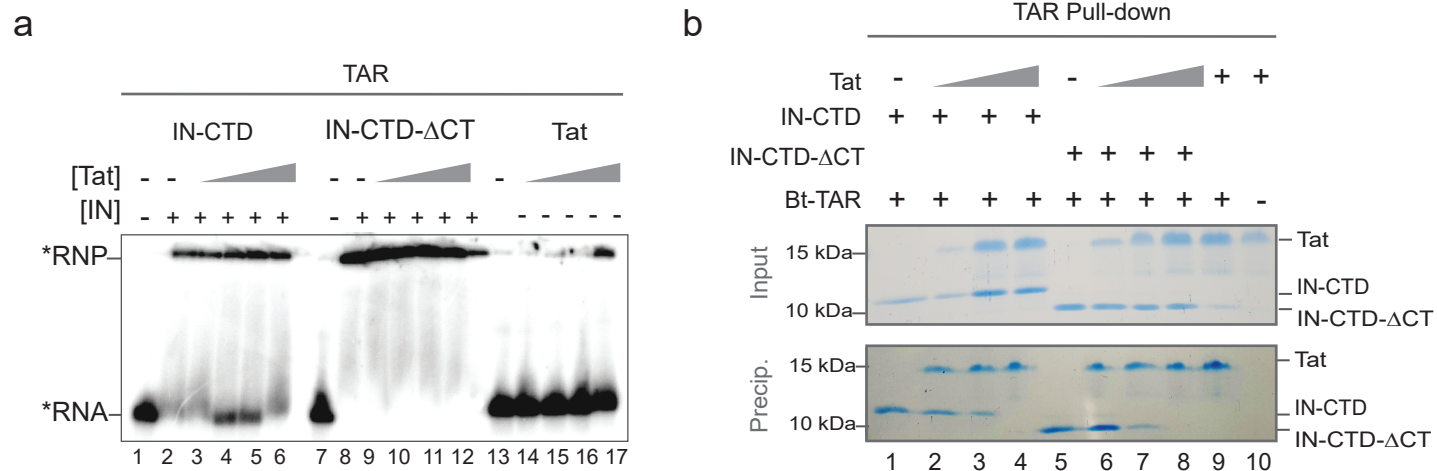



Figure 5

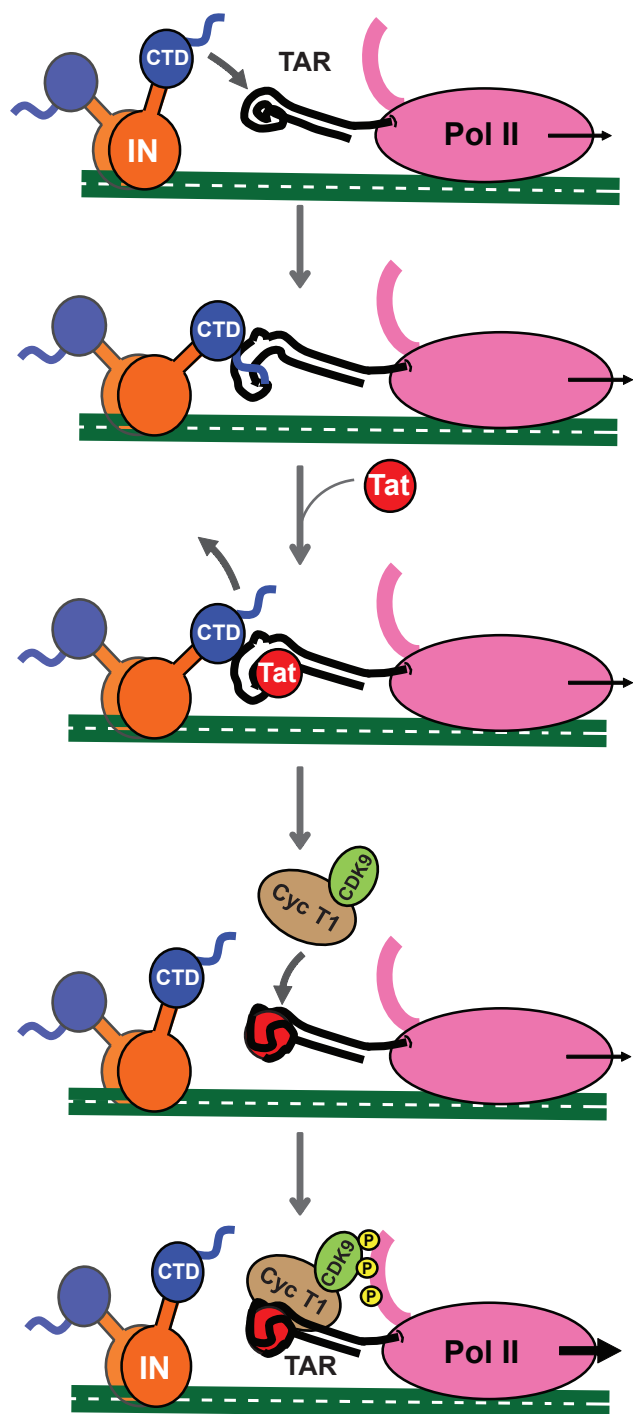

Source: https://www.biorxiv.org/content/10.1101/2021.10.21.465253v1.full.pdf
